# Supplementary material
Source: PubMed Central journal article supplement (PMC3975694)

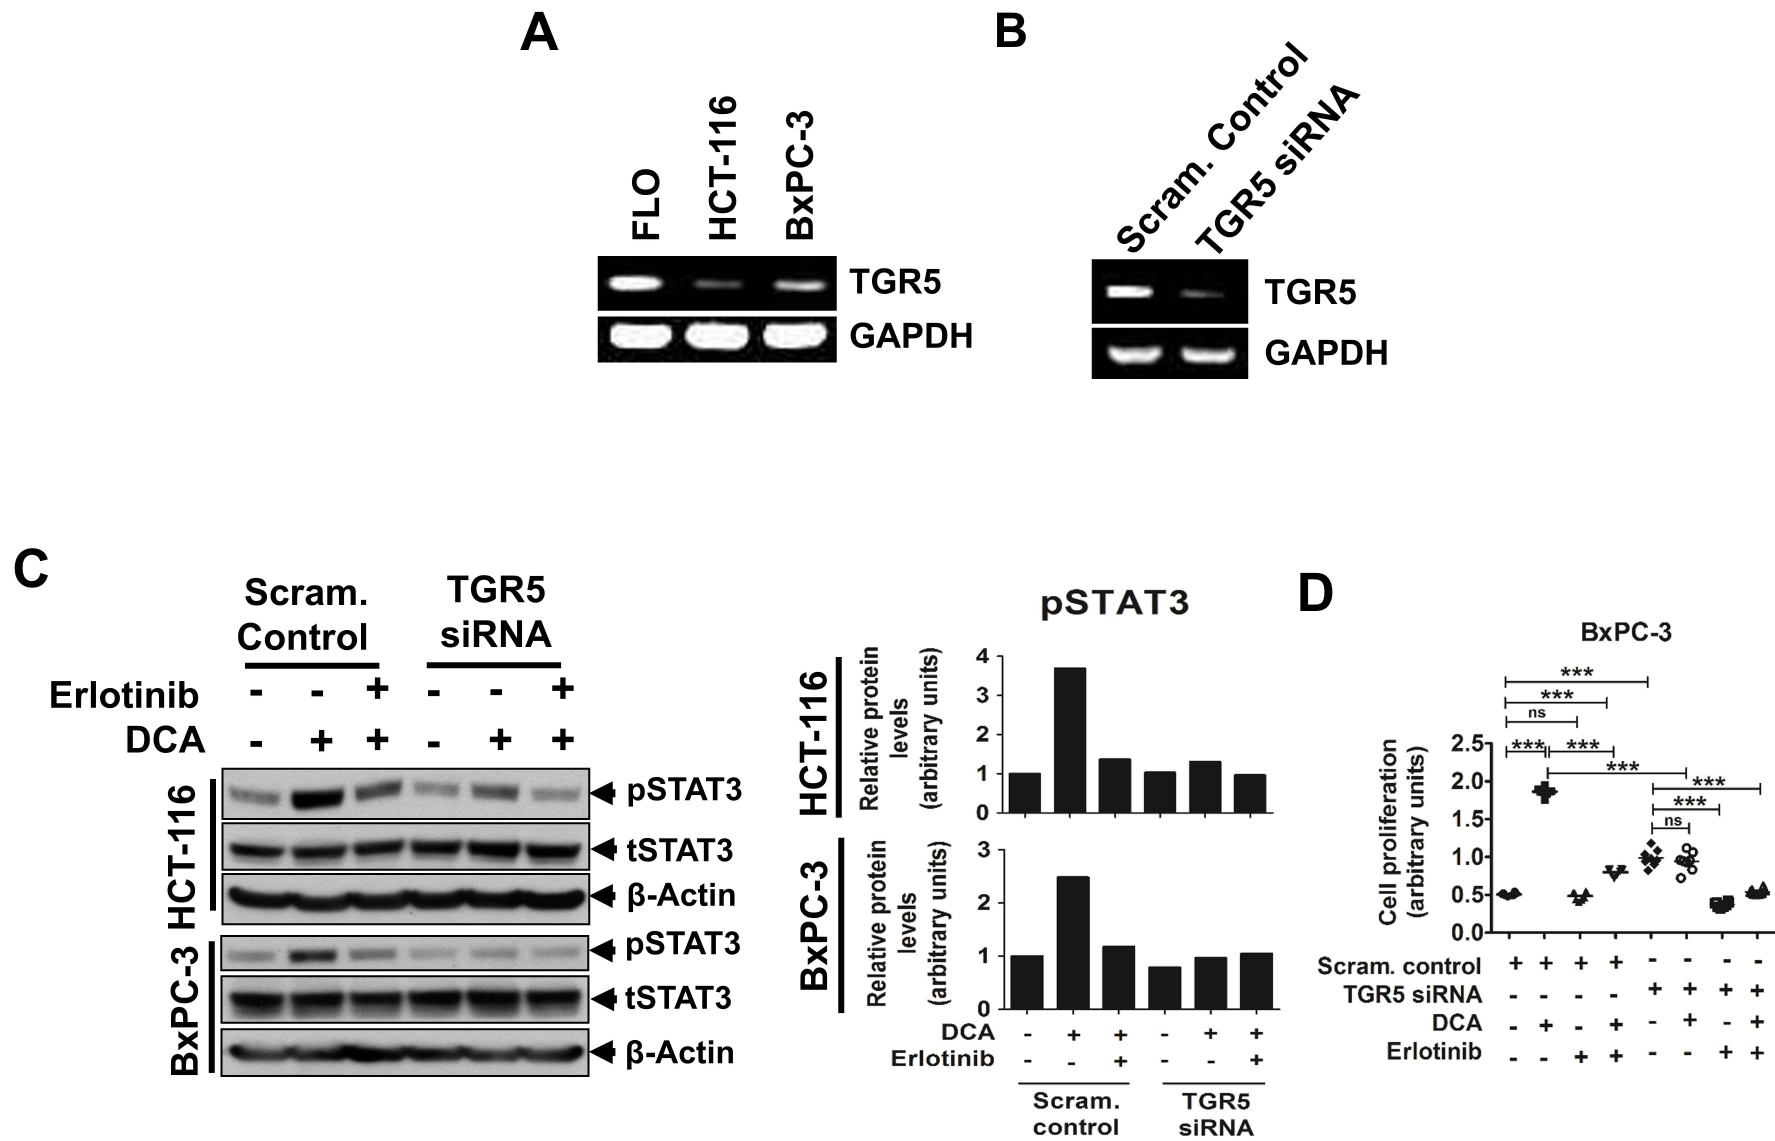

Supplementary Figure S8

Supplement: NIHMS566974-supplement-1.pdf [file NIHMS566974-supplement-1.pdf]

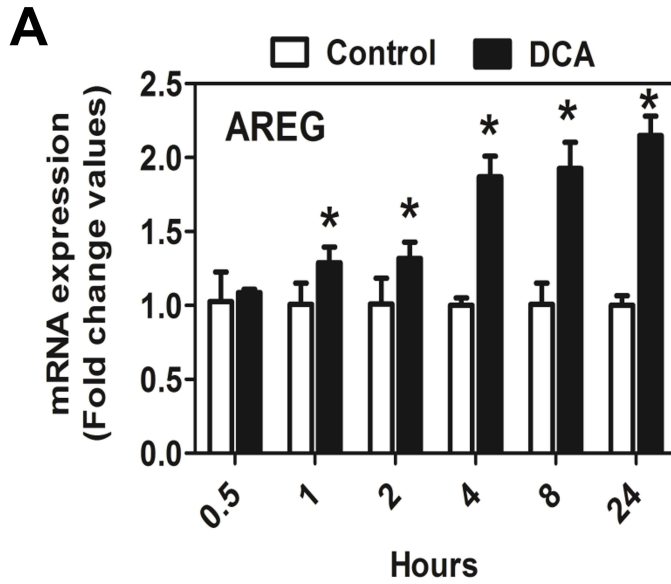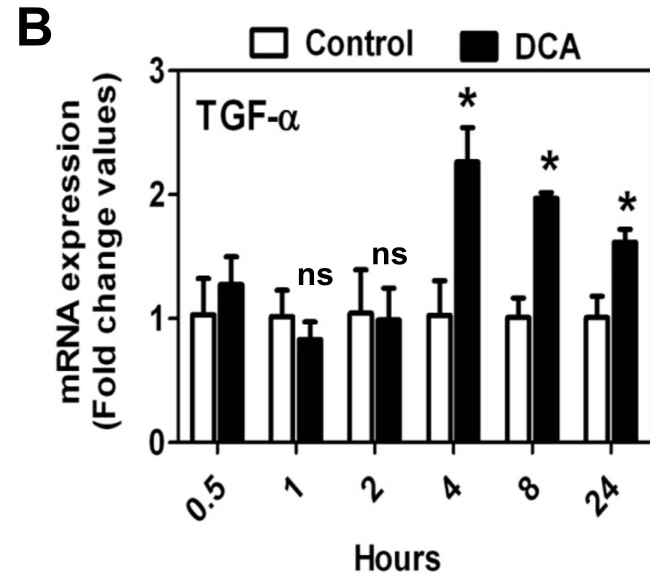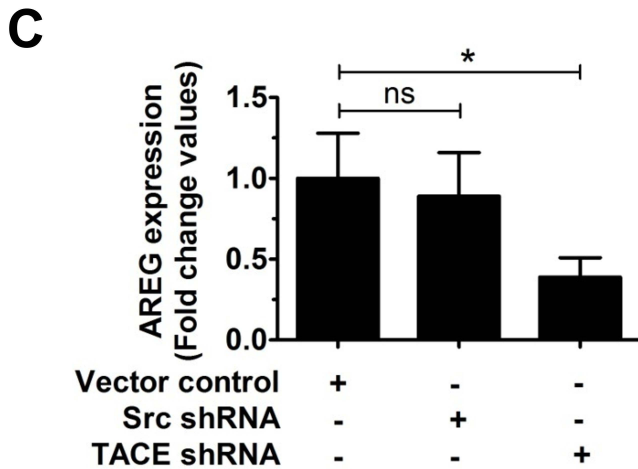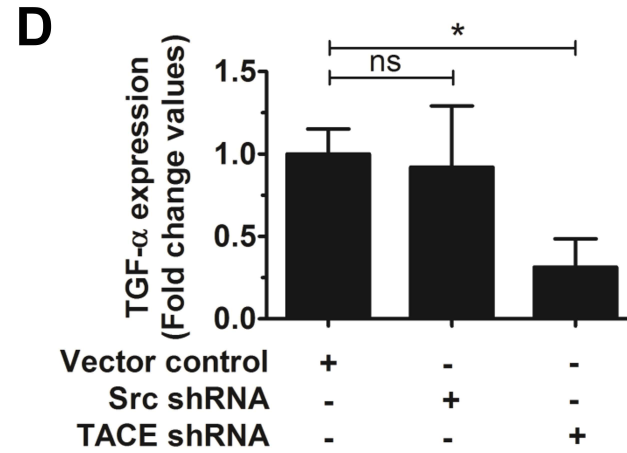

Supplementary Figure S1

Supplement: NIHMS566974-supplement-4.pdf [file NIHMS566974-supplement-4.pdf]

**A**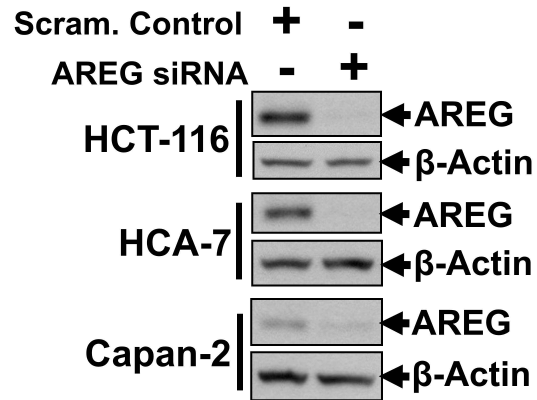**B**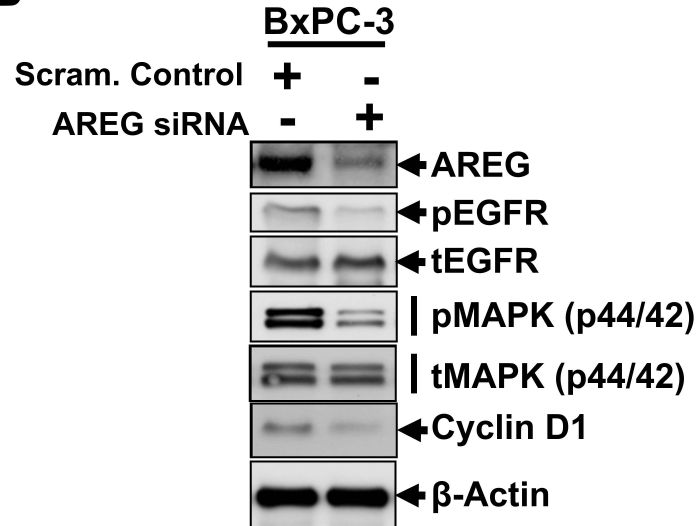**C**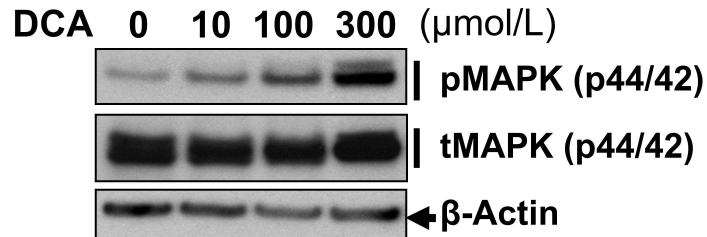**D**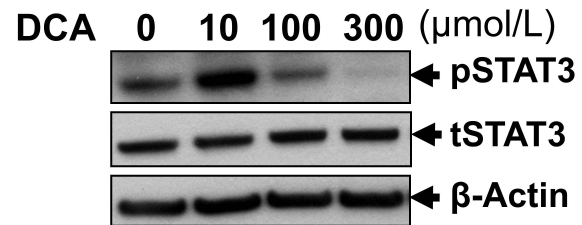

Supplementary Figure S5

Supplement: NIHMS566974-supplement-7.pdf [file NIHMS566974-supplement-7.pdf]
